# Supplementary material
Source: PubMed Central journal article supplement (PMC4687972)

## Lymph nodes and spleen

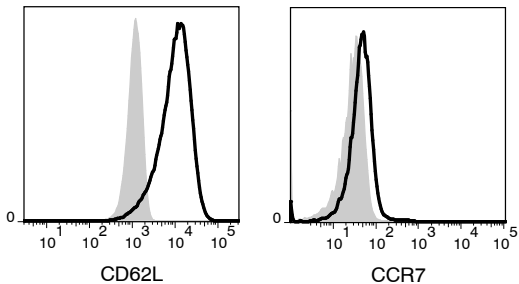

## Gut

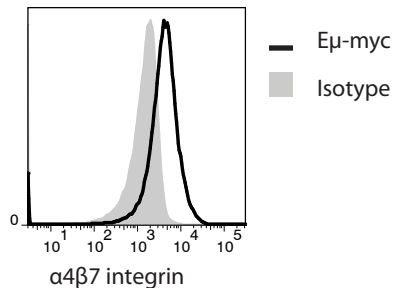

## Bone marrow

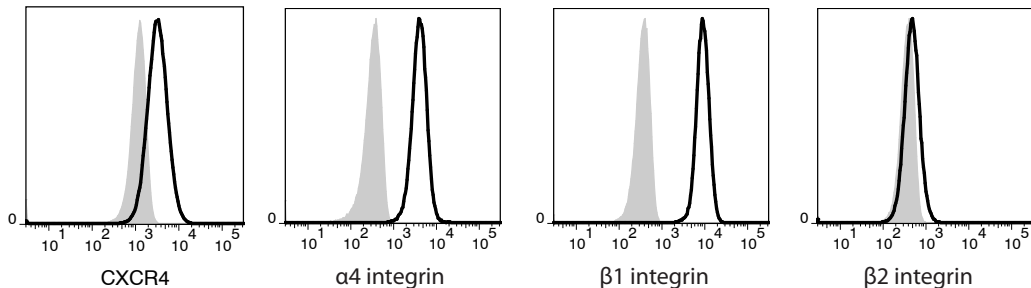

Supplement: NIHMS743835-supplement-S1.pdf [file NIHMS743835-supplement-S1.pdf]

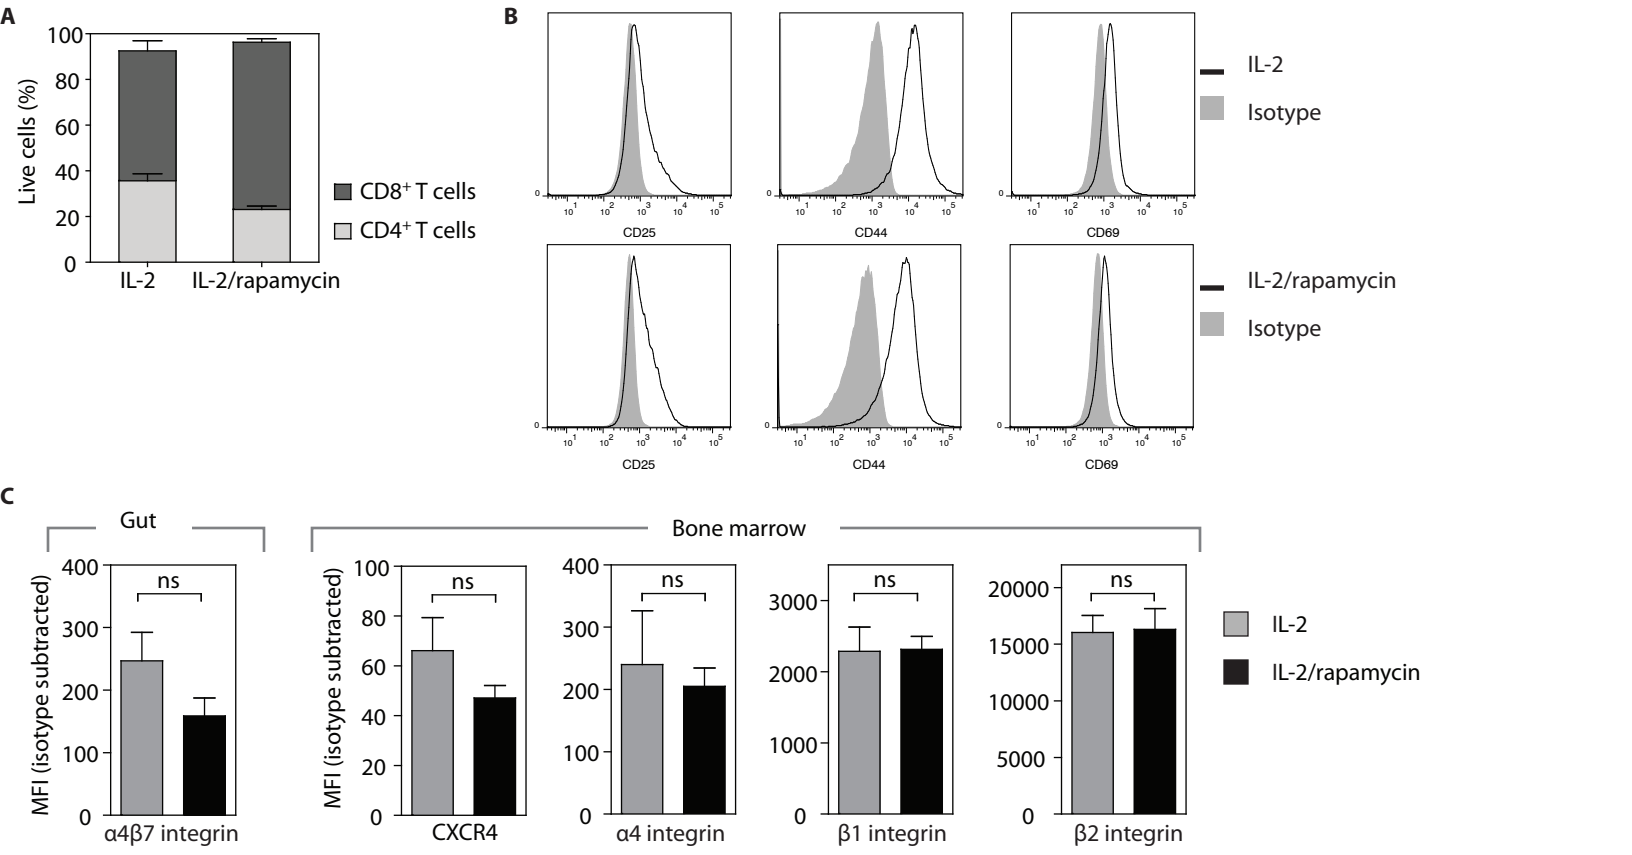

Supplement: NIHMS743835-supplement-S2.pdf [file NIHMS743835-supplement-S2.pdf]

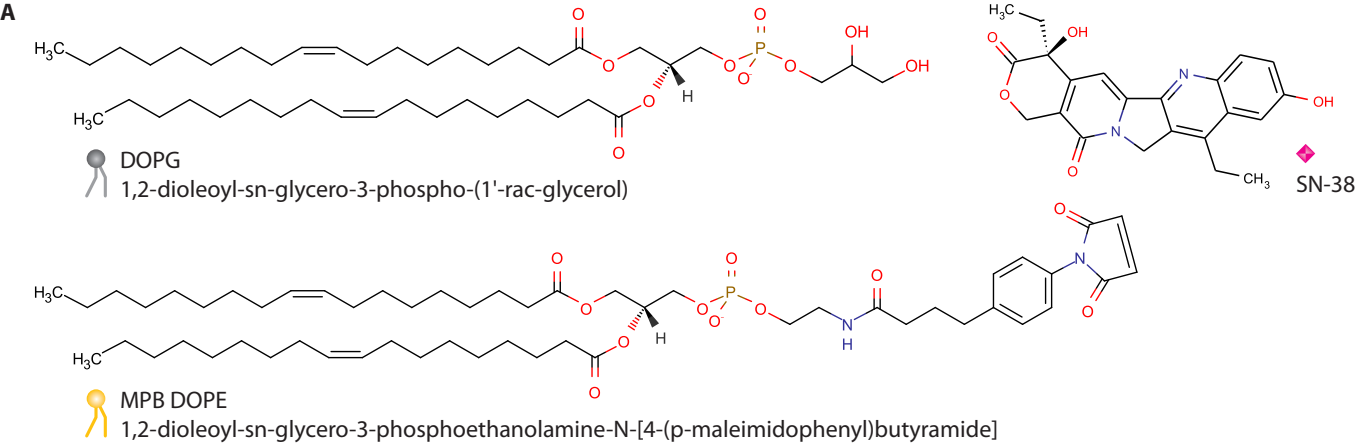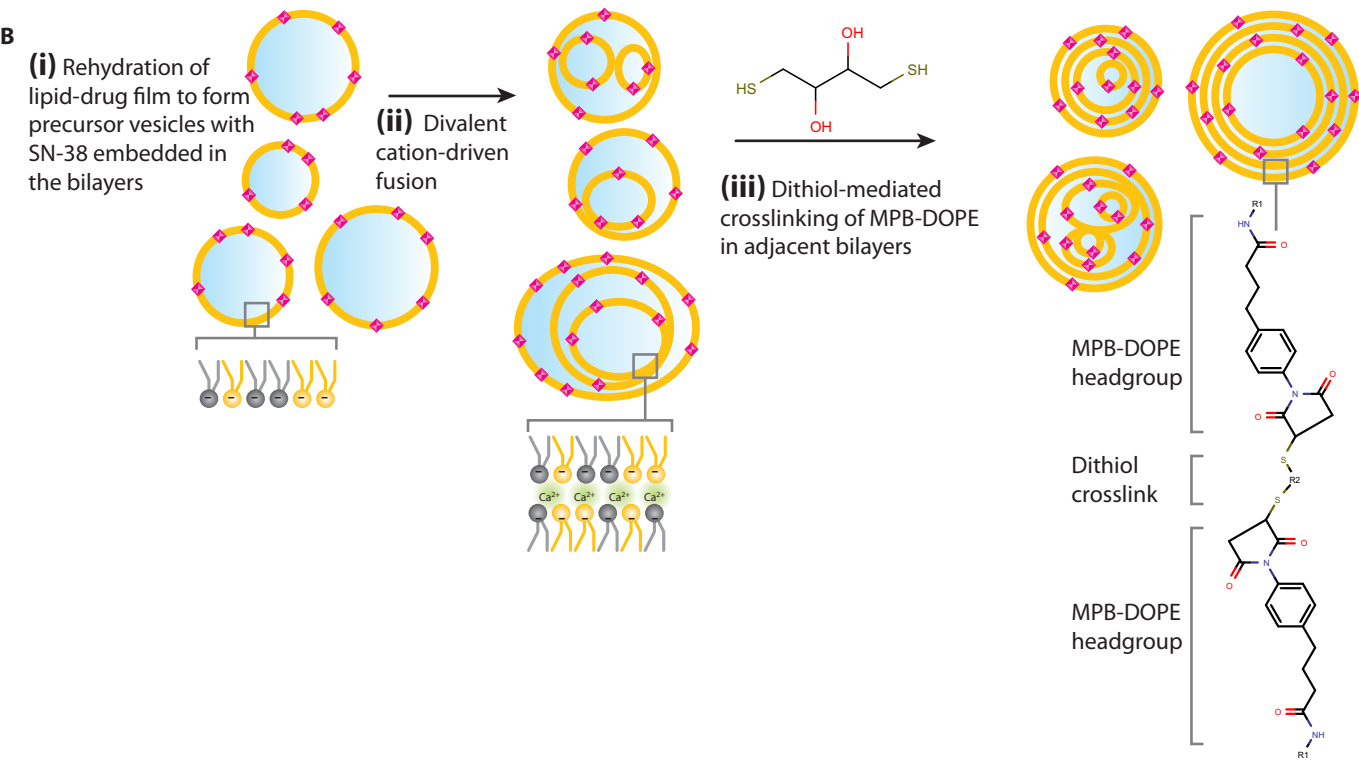

Supplement: NIHMS743835-supplement-S3.pdf [file NIHMS743835-supplement-S3.pdf]

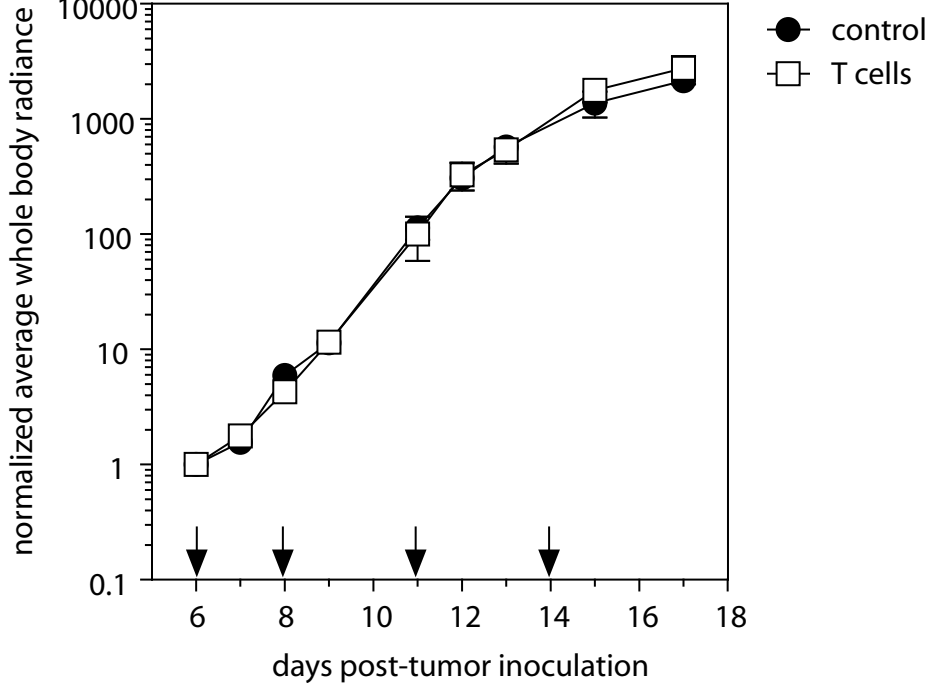

Supplement: NIHMS743835-supplement-S4.pdf [file NIHMS743835-supplement-S4.pdf]

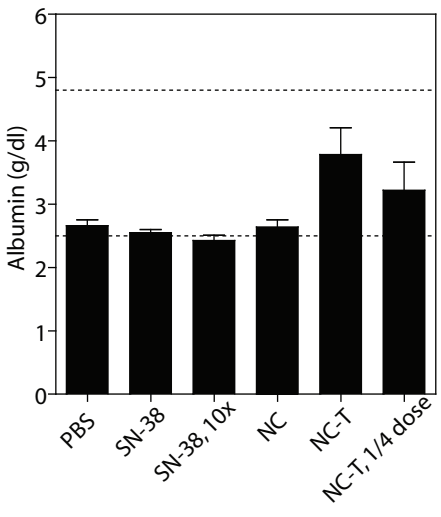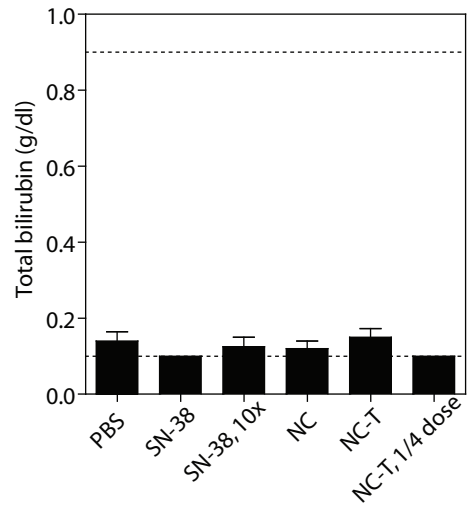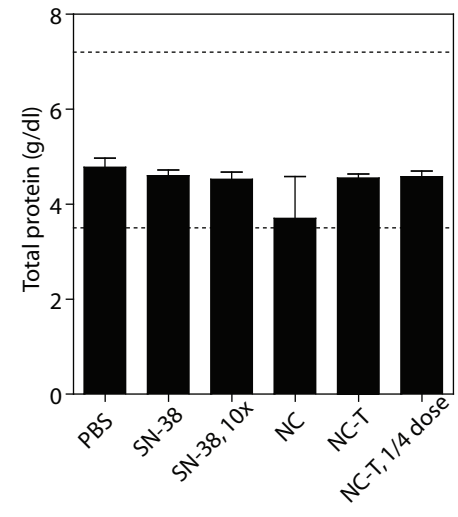

Supplement: NIHMS743835-supplement-S5.pdf [file NIHMS743835-supplement-S5.pdf]
